# Supplementary material for: Intravenous treatment with a molecular chaperone designed against β-amyloid toxicity improves Alzheimer’s disease pathology in mouse models
Source: PubMed Central journal article supplement (PMC9931549; doi:10.1016/j.ymthe.2022.08.010), 2022-08-17
Supplement: mmc1.pdf [file mmc1.pdf]

**YMTHE, Volume 31**

## **Supplemental Information**

**Intravenous treatment with a molecular chaperone**

**designed against  $\beta$ -amyloid toxicity improves**

**Alzheimer's disease pathology in mouse models**

**Shaffi Manchanda, Lorena Galan-Acosta, Axel Abelein, Simone Tambaro, Gefei Chen, Per Nilsson, and Jan Johansson**

Supplementary material to

**Intravenous treatment with a molecular chaperone designed against amyloid- $\beta$  toxicity improves features of Alzheimer disease pathology in mouse models**

Shaffi Manchanda<sup>1,2</sup>, Lorena Galan-Acosta<sup>1,2</sup>, Axel Abelein<sup>1,2</sup>, Simone Tambaro<sup>2</sup>, Gefei Chen<sup>1,2</sup>, Per Nilsson<sup>2</sup> and Jan Johansson<sup>1,2,\*</sup>

<sup>1</sup>Department of Biosciences and Nutrition, Karolinska Institutet, Neo, 141 83 Huddinge, Sweden

<sup>2</sup>Department of Neurobiology, Care Sciences and Society, Division of Neurogeriatrics, Karolinska Institutet, 171 64 Stockholm, Sweden

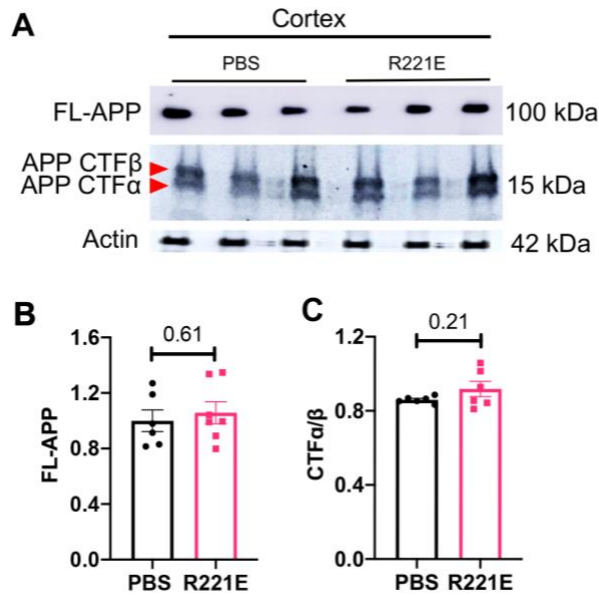

**Supplementary Fig. S1. Full-length APP and its processed forms levels remain unchanged after Rh Bri2 BRICHOS R221E treatment in *App*<sup>NL-F</sup> mice.**

Representative western blots (A) and histograms (B, C) showing levels of full-length APP (FL-APP) and ratio of APP derived C-terminal fragments (CTF $\alpha$  and CTF $\beta$ ) in cortex of PBS and rh Bri2 BRICHOS R221E treated *App*<sup>NL-F</sup> mice (n=6-7 mice/group). Data are represented as Mean  $\pm$  SEM. Unpaired parametric two-tailed t-test was used to calculate the p-values.
